# Supplementary material for: Tobacco Smoking, Alcohol Drinking, Diabetes, Low Body Mass Index and the Risk of Self-Reported Symptoms of Active Tuberculosis: Individual Participant Data (IPD) Meta-Analyses of 72,684 Individuals in 14 High Tuberculosis Burden Countries
Source: PubMed Central journal article supplement (PMC4008623; doi:10.1371/journal.pone.0096433), 2014-05-02
Supplement: pone.0096433.s001.pdf [file pone.0096433.s001.pdf]

**Table S1. Smoking, drinking, diabetes and BMI<18.5 kg/m<sup>2</sup> attributable new TB incident cases among men and women (18+ years) in 14 High Burden Countries (HBCs), 2012**

| HBCs†                                 | MEN            |              |                |              |                |              |                              |              | WOMEN          |              |               |              |                |              |                              |              |
|---------------------------------------|----------------|--------------|----------------|--------------|----------------|--------------|------------------------------|--------------|----------------|--------------|---------------|--------------|----------------|--------------|------------------------------|--------------|
|                                       | Smoking*       |              | Drinking†      |              | Diabetes‡      |              | BMI<18.5 kg/m <sup>2</sup> ¶ |              | Smoking*       |              | Drinking†     |              | Diabetes‡      |              | BMI<18.5 kg/m <sup>2</sup> ¶ |              |
|                                       | TB cases       | PAF          | TB cases       | PAF          | TB cases       | PAF          | TB cases                     | PAF          | TB cases       | PAF          | TB cases      | PAF          | TB cases       | PAF          | TB cases                     | PAF          |
| India                                 | 190,453        | 13%          | 126,868        | 8%           | 215,636        | 14%          | 346,530                      | 23%          | 28,470         | 4%           | 5,077         | 1%           | 79,004         | 11%          | 128,848                      | 19%          |
| China                                 | 170,722        | 24%          | 160,811        | 22%          | 112,313        | 16%          | 62,644                       | 9%           | 7,132          | 3%           | 5,072         | 2%           | 35,538         | 13%          | 19,428                       | 7%           |
| South Africa                          | 34,586         | 12%          | 66,836         | 23%          | 31,714         | 11%          | 25,861                       | 9%           | 21,543         | 9%           | 17,328        | 7%           | 23,159         | 10%          | 18,726                       | 8%           |
| Pakistan                              | 36,554         | 17%          | -              | -            | 25,034         | 12%          | 57,647                       | 27%          | 13,064         | 7%           | -             | -            | 18,911         | 10%          | 44,638                       | 23%          |
| Bangladesh                            | 52,963         | 23%          | 2,288          | 1%           | 31,590         | 14%          | 48,628                       | 21%          | 2,967          | 2%           | -             | 0%           | 18,325         | 15%          | 27,830                       | 23%          |
| Phillipines                           | 39,262         | 21%          | 52,501         | 29%          | 24,452         | 13%          | 22,222                       | 12%          | 7,766          | 10%          | 3,828         | 5%           | 9,279          | 12%          | 8,376                        | 11%          |
| Ethiopia                              | 4,649          | 4%           | 24,095         | 19%          | 7,317          | 6%           | 26,578                       | 21%          | -              | 0%           | 10,391        | 10%          | 5,944          | 6%           | 21,573                       | 21%          |
| DR Congo                              | 6,113          | 5%           | 20,791         | 18%          | 5,125          | 4%           | 7,996                        | 7%           | 1,807          | 2%           | 10,201        | 11%          | 3,929          | 4%           | 7,640                        | 8%           |
| Viet Nam                              | 21,418         | 22%          | 32,673         | 34%          | 5,000          | 5%           | 22,142                       | 23%          | 606            | 2%           | 671           | 2%           | 1,534          | 5%           | 6,862                        | 21%          |
| Myanmar                               | 23,419         | 18%          | 10,154         | 8%           | 14,460         | 11%          | 17,431                       | 13%          | 5,703          | 8%           | 171           | 0%           | 7,040          | 10%          | 9,666                        | 14%          |
| Russia                                | 26,288         | 28%          | 34,648         | 37%          | 15,714         | 17%          | 1,051                        | 1%           | 7,191          | 20%          | 7,436         | 21%          | 6,083          | 17%          | 1,351                        | 4%           |
| Kenya                                 | 9,142          | 12%          | 12,390         | 17%          | 5,139          | 7%           | 8,501                        | 12%          | -              | 0%           | 1,280         | 3%           | 2,852          | 6%           | 4,718                        | 10%          |
| Brazil                                | 7,518          | 12%          | 17,182         | 27%          | 9,563          | 15%          | 2,660                        | 4%           | 4,054          | 14%          | 3,101         | 11%          | 4,105          | 14%          | 1,127                        | 4%           |
| Zimbabwe                              | 6,219          | 15%          | 8,067          | 19%          | 5,009          | 12%          | 2,642                        | 6%           | 1,773          | 4%           | 555           | 2%           | 5,307          | 15%          | 2,833                        | 8%           |
| <b>14 HBCs</b>                        | <b>629,304</b> | <b>16%</b>   | <b>569,304</b> | <b>15%</b>   | <b>508,066</b> | <b>13%</b>   | <b>652,534</b>               | <b>17%</b>   | <b>102,076</b> | <b>5%</b>    | <b>65,111</b> | <b>3%</b>    | <b>221,011</b> | <b>11%</b>   | <b>303,614</b>               | <b>15%</b>   |
| <b>Proportion to 14 TB HBCs</b>       | <b>16%</b>     | <b>(...)</b> | <b>15%</b>     | <b>(...)</b> | <b>13%</b>     | <b>(...)</b> | <b>17%</b>                   | <b>(...)</b> | <b>5%</b>      | <b>(...)</b> | <b>3%</b>     | <b>(...)</b> | <b>11%</b>     | <b>(...)</b> | <b>15%</b>                   | <b>(...)</b> |
| <b>Proportion to 22 TB HBCs</b>       | <b>14%</b>     | <b>(...)</b> | <b>12%</b>     | <b>(...)</b> | <b>11%</b>     | <b>(...)</b> | <b>14%</b>                   | <b>(...)</b> | <b>4%</b>      | <b>(...)</b> | <b>3%</b>     | <b>(...)</b> | <b>9%</b>      | <b>(...)</b> | <b>13%</b>                   | <b>(...)</b> |
| <b>Proportion to global TB burden</b> | <b>11%</b>     | <b>(...)</b> | <b>10%</b>     | <b>(...)</b> | <b>9%</b>      | <b>(...)</b> | <b>12%</b>                   | <b>(...)</b> | <b>3%</b>      | <b>(...)</b> | <b>2%</b>     | <b>(...)</b> | <b>7%</b>      | <b>(...)</b> | <b>10%</b>                   | <b>(...)</b> |

\*Sources of prevalence for daily smoking were taken from Global Adult Tobacco Survey (GATS)<sup>17</sup>, Demographic and Health Survey (DHS)<sup>16</sup>, World Health Survey (WHS)<sup>21</sup>; RR men=1.71 (99% CI:1.20–2.70) and RR women=2.44 (99% CI:1.54–4.17) were taken from our continuous dose-response meta-regression model. † Prevalences for daily alcohol drinking (men: 40+ grams/day; women: 20+ grams/day) were taken from WHS<sup>21</sup> and where data on large nationally representative surveys were available<sup>16,18</sup>; RR men=1.84 (99% CI:1.32–2.83) and RR women=1.61 (99% CI:1.11–2.49) were taken from our continuous dose-response meta-regression model. ‡ Prevalence on diabetes were taken from International Diabetes Federation (2011)<sup>19</sup>; RR men=2.87 (99% CI:1.44–5.69) and RR women=2.68 (99% CI: 1.35–5.32) were taken from our D-L meta analysis. ¶ Prevalence on low BMI (<18.5 kg/m<sup>2</sup>) were taken from DHS<sup>16</sup>; RR men=2.12 (99% CI: 1.41–3.31) and RR women=2.00 (99% CI: 1.43–3.24) were taken our continuous dose-response meta-regression model.
